# Supplementary material for: Human glutaredoxin-1 can transfer copper to isolated metal binding domains of the P1B-type ATPase, ATP7B
Source: PubMed Central journal article supplement (PMC7057996; doi:10.1038/s41598-020-60953-z), 2020-03-05
Supplement: 41598_2020_60953_MOESM1_ESM.pdf [file 41598_2020_60953_MOESM1_ESM.pdf]

1 SUPPLEMENTARY INFORMATION

2  
3 **Human glutaredoxin-1 can transfer copper to isolated metal binding domains of the P<sub>1B</sub>-type**  
4 **ATPase, ATP7B**

5  
6 Shadi Maghool<sup>1</sup>, Sharon La Fontaine<sup>2,3</sup>, Blaine R. Roberts<sup>3</sup>, Ann H. Kwan<sup>4,\*</sup> and Megan J. Maher<sup>1,5\*</sup>

7  
8 <sup>1</sup>*Department of Biochemistry and Genetics, La Trobe Institute for Molecular Science, La Trobe*  
9 *University, Melbourne, VIC Australia.*

10 <sup>2</sup>*School of Life and Environmental Sciences, Deakin University, Geelong, VIC Australia.*

11 <sup>3</sup>*The Florey Institute of Neuroscience, The University of Melbourne, Parkville, VIC, Australia.*

12 <sup>4</sup>*School of Life and Environmental Sciences, The University of Sydney, Sydney, NSW Australia.*

13 <sup>5</sup>*School of Chemistry and The Bio21 Molecular Science and Biotechnology Institute, The University of*  
14 *Melbourne, Parkville, Australia.*

15  
16  
17 \*Corresponding authors:

18 A/Prof. Megan Maher,  
19 School of Chemistry and The Bio21 Molecular Science and Biotechnology Institute,  
20 The University of Melbourne,  
21 Melbourne, Victoria, 3010 Australia.  
22 Phone: +61 3 9035 7451  
23 E-mail: [megan.maher@unimelb.edu.au](mailto:megan.maher@unimelb.edu.au)

24  
25 Dr Ann Kwan,  
26 School of Life and Environmental Sciences and Sydney Nano Institute,  
27 University of Sydney,  
28 Maze Crescent,  
29 Sydney, NSW 2006, Australia  
30 Phone: +61 2 9351 3911  
31 E-mail: [ann.kwan@sydney.edu.au](mailto:ann.kwan@sydney.edu.au)

35 **Table S1** Cu:protein stoichiometries for purified proteins

36

37

38

| Protein | [Cu]/[Protein]  |
|---------|-----------------|
| hGrx1   | $0.97 \pm 0.02$ |
| Atox1   | $1.01 \pm 0.05$ |
| WLN5-6  | $1.94 \pm 0.03$ |

39 **Table S2** Apparent Cu(I) dissociation constants  $K_D$  for the Cu(I)-binding sites for the hGrx1, Atox1  
40 and WLN5-6 proteins, determined *via* competition with Bcs.

41

| Protein | Log $K_D$ pH 7.0 |                        |
|---------|------------------|------------------------|
|         | This work        | Ref                    |
| hGrx1   | -15.8            | -15.5 <sup>10</sup>    |
| Atox1   | -17.5            | -17.4 <sup>10,44</sup> |
| WLN5-6  | -17.8            | -17.6 <sup>44</sup>    |

42

43

44

45

46

## 47 **Supplementary Figure Captions**

48

49 **Figure S1** Analyses of purified  $^{15}\text{N}$ -hGrx1, Atox1, hGrx1 and WLN5-6 proteins by Coomassie Brilliant  
50 Blue (CBB)-stained SDS-PAGE. Pre-stained SDS-PAGE protein marker (Bio-Rad, lane 1) and protein  
51 samples (10  $\mu\text{g}$ , lanes 2-5) were resolved by electrophoresis with a 10% Bis-Tris gel under reducing  
52 conditions (Thermo Fisher Scientific).

53

### 54 **Figure S2**

55 Results of Cu exchange reactions between Cu(I)-hGrx1 and partner proteins. (A) Cu(I)-hGrx1, (B) Cu(I)-  
56 Atox1 and (C) Cu(I)-WLN5-6 were applied to an anion exchange column and fractions analyzed for the  
57 presence of protein ( $A_{280}$ , solid lines) and for Cu(I) with Bcs (the  $[\text{Cu}^{\text{I}}\text{Bcs}_2]^{3-}$  complex is detected  
58 colorimetrically at  $A_{483}$ , dashed orange lines). (D) Results of Cu exchange reaction between Cu(I)-hGrx1  
59 and *apo*-Atox1. Cu(I)-hGrx1 and *apo*-Atox1 were incubated together at 1:1 molar and re-separated using  
60 anion exchange. (E) Cu exchange between Cu(I)-Atox1 and *apo*-hGrx1. (F) Cu exchange between Cu(I)-  
61 WLN5-6 and *apo*-Atox1 (G) Cu exchange between Cu(I)-Atox1 and *apo*-WLN5-6. (H) Cu exchange  
62 between Cu(I)-hGrx1, and a mixture of the *apo*-Atox1 and *apo*-WLN5-6 proteins. Cu(I)-hGrx1, *apo*-  
63 Atox1 and *apo*-WLN5-6 were incubated together at molar ratio of 1:1:1 and re-separated using anion  
64 exchange ( $A_{280}$ , pink solid line) and fractions colorimetrically analysed for the presence of Cu (orange  
65 dashed line).

66

67 **Figure S3** Schematic representations of related Cu exchange experiments conducted in this work. The  
68 ✓ symbol indicates that Cu transferred between proteins and the X symbol indicates that it is not. This  
69 figure was generated with Microsoft PowerPoint for Mac (Version 16.31).

70

71 **Figure S4** Assigned  $^{15}\text{N}$ - $^1\text{H}$ -HSQC spectrum of  $^{15}\text{N}$ - $^{13}\text{C}$  *apo*-hGrx1. Lines indicate sidechain resonances  
72 from Asn and Gln residues.

73

74 **Figure S5A** Comparison of  $^{15}\text{N}$ - $^1\text{H}$ -HSQC spectra of *apo*-hGrx1 and Cu(I)-hGrx1. (A) Overlay of  $^{15}\text{N}$ -  
75  $^1\text{H}$ -HSQC spectra of *apo*-hGrx1 (red) and Cu(I)-hGrx1 (blue). Residues that display significant chemical  
76 shift changes (including positional and intensity) are labeled. Arrows show groups of peaks that belong  
77 to the same amino acid in the two states.

78 **Figure S5B** Histogram showing combined H and N chemical shift changes comparing  $^{15}\text{N}$ -Cu(I)-hGrx1  
79 and  $^{15}\text{N}$ -*apo*-hGrx1.

80 **Figure S5C** Histogram showing changes in peak heights comparing  $^{15}\text{N}$ -Cu(I)-hGrx1 and  $^{15}\text{N}$ -*apo*-  
81 hGrx1.  
82

83 **Figure S6A** Histogram showing combined H and N chemical shift changes during WLN5-6 titrations to  
84  $^{15}\text{N}$ -Cu(I)-hGrx1. Results were shown for titrations of WLN5-6 to  $^{15}\text{N}$ -Cu(I)-hGrx1 at molar ratios of  
85 1:1 (blue), 2:1 (green) and 7:1 (pink).  
86 **Figure S6B** Histogram showing changes in peak heights during WLN5-6 titrations during WLN5-6  
87 titrations to  $^{15}\text{N}$ -Cu(I)-hGrx1. Results were shown for titrations of WLN5-6 to  $^{15}\text{N}$ -Cu(I)-hGrx1 at molar  
88 ratios of 1:1 (blue), 2:1 (green) and 7:1 (pink).  
89

90 **Figure S7A**  $^{15}\text{N}$ - $^1\text{H}$ -HSQC spectra of  $^{15}\text{N}$ -Cu(I)-hGrx1 titrated with Atox1. Overlay of  $^{15}\text{N}$ - $^1\text{H}$ -HSQC  
91 spectra of Cu(I)-hGrx1 before (blue) and after additions of Atox1 at Cu(I)-hGrx1:Atox1 molar ratios of  
92 2.2:1 (green) and 3.8:1 (pink). Residues that display significant chemical shift changes (including  
93 positional and intensity) are labelled.  
94 **Figure S7B** Histogram showing combined H and N chemical shift changes during Atox1 titrations to  
95  $^{15}\text{N}$ -Cu(I)-hGrx1. Results were shown for titrations of Atox1 to  $^{15}\text{N}$ -Cu(I)-hGrx1 at molar ratios of 2.2:1  
96 (blue) and 3.8:1 (pink).  
97 **Figure S7C** Histogram showing changes in peak heights during Atox1 titrations during Atox1 titrations  
98 to  $^{15}\text{N}$ -Cu(I)-hGrx1. Results were shown for titrations of Atox1 to  $^{15}\text{N}$ -Cu(I)-hGrx1 at molar ratios of  
99 2.2:1 (blue) and 3.8:1 (pink).  
100

101 **Figure S8A.**  $^{15}\text{N}$ - $^1\text{H}$ -HSQC spectra of  $^{15}\text{N}$ -*apo*-hGrx1 titrated with Atox1. Overlay of  $^{15}\text{N}$ - $^1\text{H}$ -HSQC  
102 spectra of *apo*-hGrx1 before (red) and after additions of Atox1 at *apo*-hGrx1:Atox1 molar ratios of 0.1:1  
103 (black) and 1.1:1 (cyan). Residues that display significant chemical shift changes (including positional  
104 and intensity) are labeled.  
105 **Figure S8B** Histogram showing combined H and N chemical shift changes during Atox1 titrations to  
106  $^{15}\text{N}$ -*apo*-hGrx1. Results were shown for titrations of Atox1 to  $^{15}\text{N}$ -*apo*-hGrx1 at molar ratios of 0.1:1  
107 (black) and 1.1:1 (cyan).  
108 **Figure S8C** Histogram showing changes in peak heights during Atox1 titrations during Atox1 titrations  
109 to  $^{15}\text{N}$ -*apo*-hGrx1. Results were shown for titrations of Atox1 to  $^{15}\text{N}$ -*apo*-hGrx1 at molar ratios of 0.1:1  
110 (black) and 1.1:1 (cyan).  
111

112 **Figure S9A**  $^{15}\text{N}$ - $^1\text{H}$ -HSQC spectra of  $^{15}\text{N}$ -*apo*-hGrx1 titrated with WLN5-6. Overlay of  $^{15}\text{N}$ - $^1\text{H}$ -HSQC  
113 spectra of *apo*-hGrx1 before (red) and after additions of WLN5-6 at *apo*-hGrx1:WLN5-6 molar ratios of  
114 0.2:1 (black) and 1:1 (cyan). Residues that display significant chemical shift changes (including  
115 positional and intensity) are labeled.

116 **Figure S9B** Histogram showing combined H and N chemical shift changes during WLN5-6 titrations to  
117  $^{15}\text{N}$ -*apo*-hGrx1. Results were shown for titrations of WLN5-6 to  $^{15}\text{N}$ -*apo*-hGrx1 at molar ratios of 0.2:1  
118 (black) and 1:1 (cyan).

119 **Figure S9C** Histogram showing changes in peak heights during WLN5-6 titrations during WLN5-6  
120 titrations to  $^{15}\text{N}$ -*apo*-hGrx1. Results were shown for titrations of WLN5-6 to  $^{15}\text{N}$ -*apo*-hGrx1 at molar  
121 ratios of 0.2:1 (black) and 1:1 (cyan).

122

123 **Figure S10A**  $^{15}\text{N}$ - $^1\text{H}$ -HSQC titrations of Atox1 into  $^{15}\text{N}$ -*apo*-hGrx1 in absence of Cu(I). Peak heights  
124 (arbitrary units, black squares) and fitted values (lines) for a 1:1 binding model are shown for residues  
125 C23 and T69. Residuals of the fits are shown as red squares in the bottom plots.

126 **Figure S10B**  $^{15}\text{N}$ - $^1\text{H}$ -HSQC titrations of WLN5-6 into  $^{15}\text{N}$ -*apo*-hGrx1 in absence of Cu(I). Peak heights  
127 (arbitrary units, black squares) and fitted values (lines) for a 1:1 binding model are shown for residues  
128 C23 and T69. Residuals of the fits are shown as red squares in the bottom plots.

129

130 **Figure S11** Electrostatic surface structures of hGrx1, Atox1 and WLN5-6. (A) hGrx1 (PDB code  
131 4RQR<sup>41</sup>), (B) Atox1 (PDB code 1FEE<sup>58</sup>), (C) WLN5-6 (PDB code 2EW9<sup>21</sup>). The top panels show the  
132 electrostatic surface structures of the proteins, colored according to the electrostatic potentials (red:  
133 negatively charged; blue: positively charged; white: uncharged). In the bottom panels the secondary  
134 structures of the proteins are represented as cartoons in identical orientations. hGrx1: cyan; Atox1: pink  
135 and WLN 5-6: gray. Cysteine residues in the C-XX-C motifs are shown as yellow spheres. This figure  
136 was generated with PyMOL (The PyMOL Molecular Graphics System, Version 2.0 Schrödinger, LLC).

137

138

139

140

141

142

143  
144  
145  
146  
147  
148  
149  
150  
151  
152  
153  
154  
155

**Figure S1.**

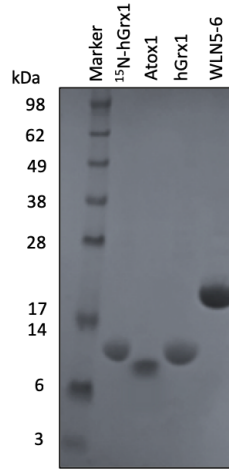

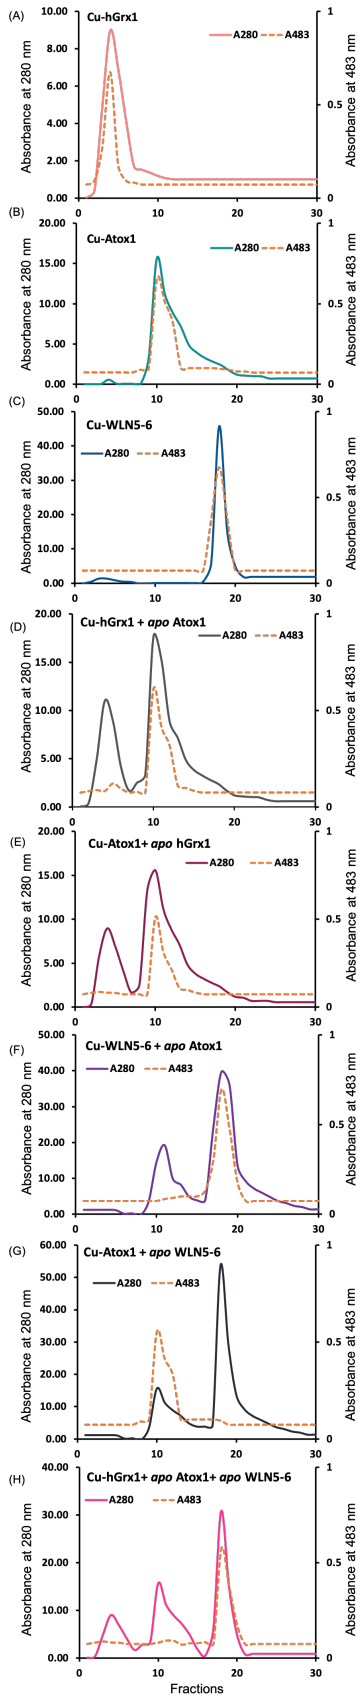

156

157

Figure S2.



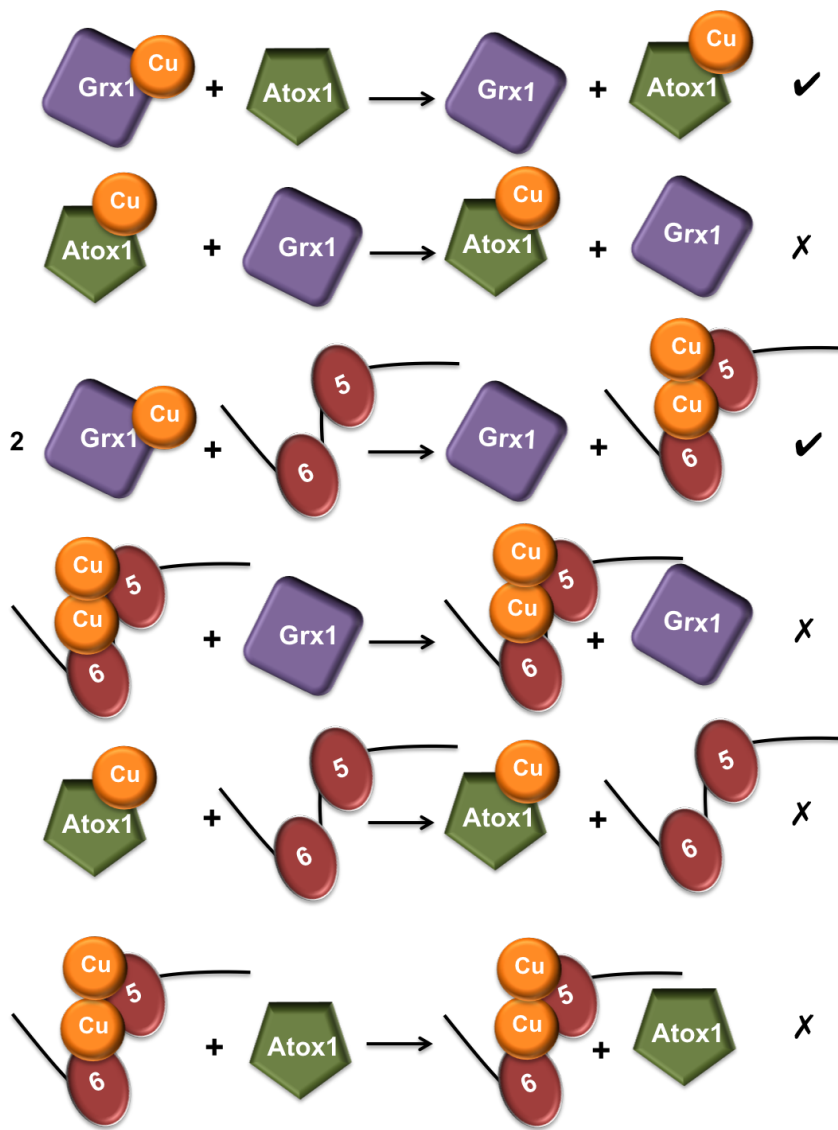

158  
159  
160  
161

**Figure S3.**

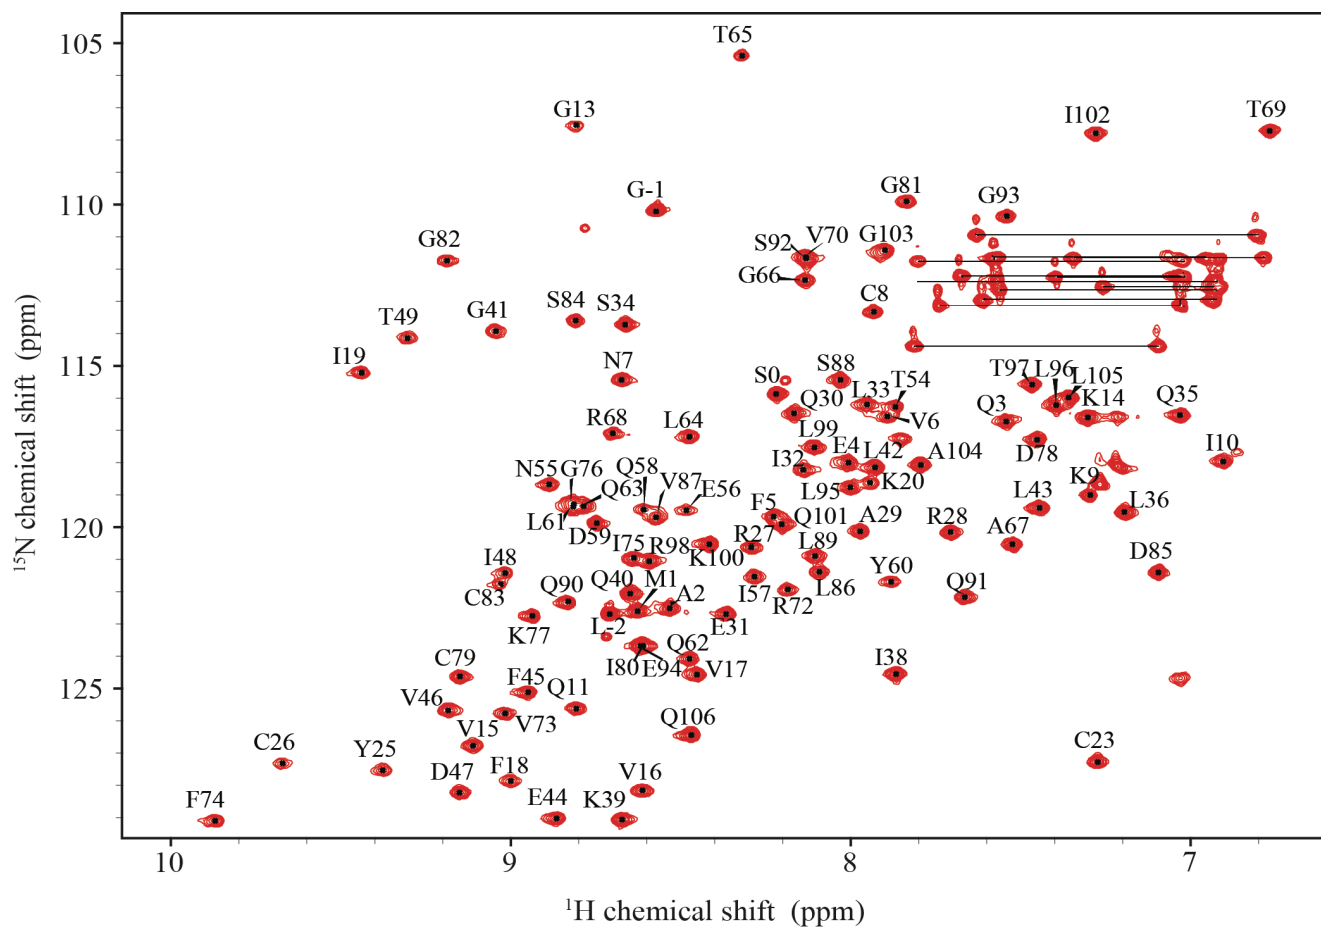

162  
163  
164  
165  
**Figure S4.**

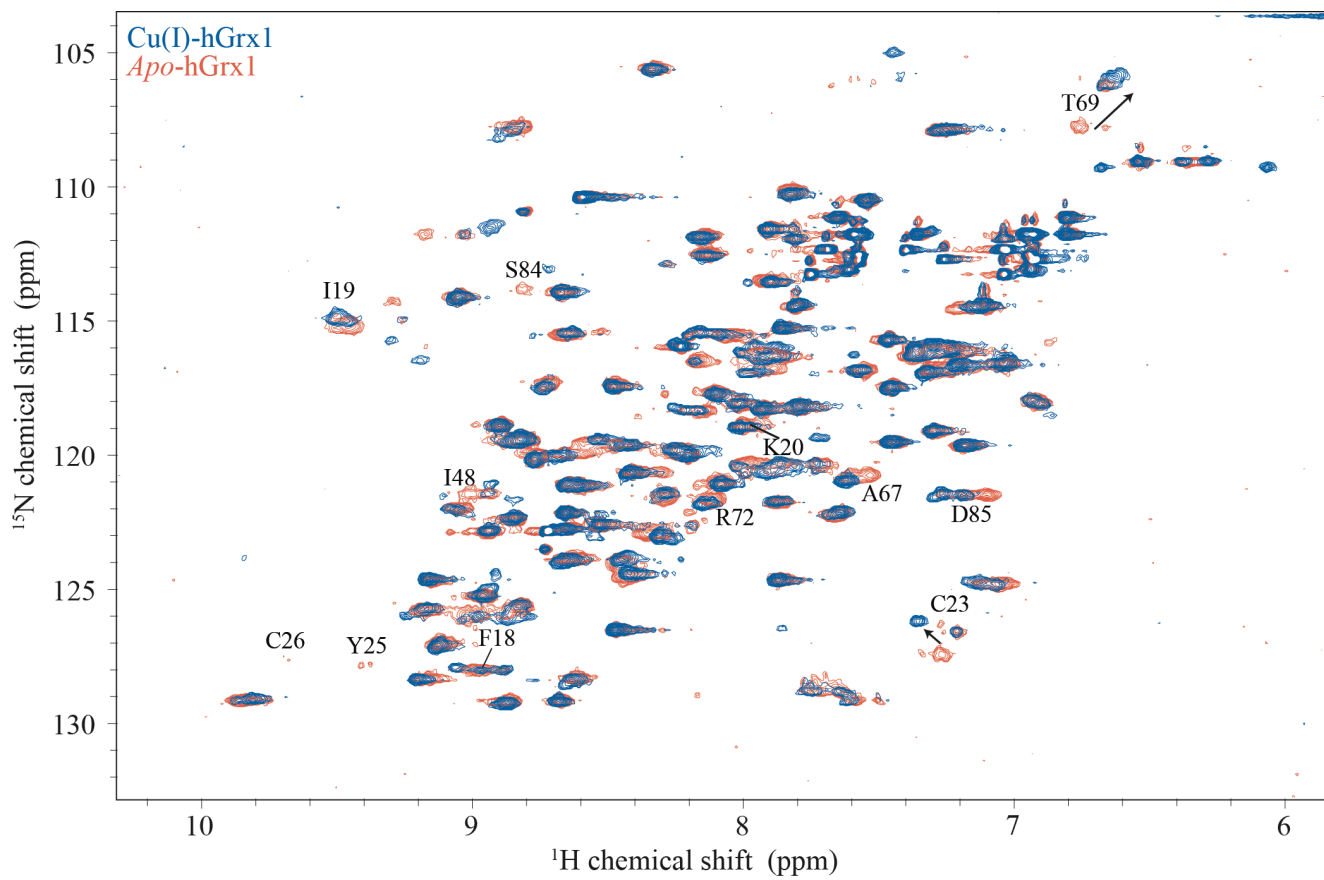

166  
167 **Figure S5A**  
168

Combined  $\Delta_{H+N}$  chemical shift comparing Cu(I)-hGrx1 to Apo-hGrx1

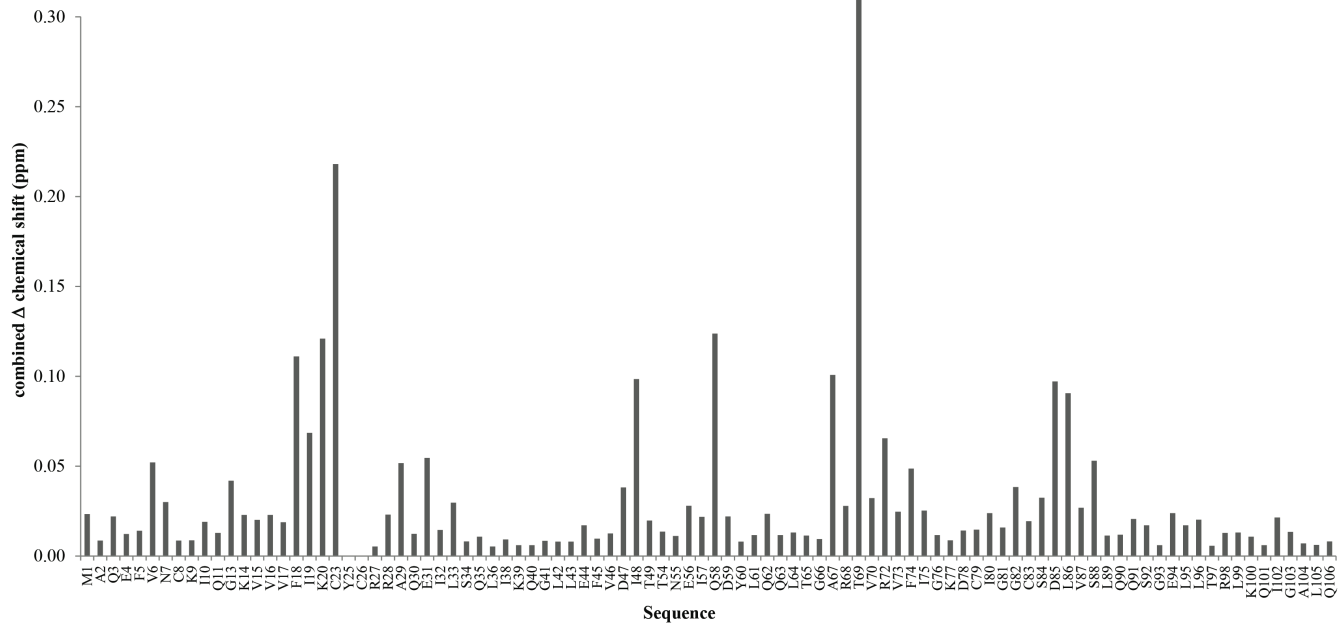

169  
170  
171  
172

Figure S5B

Scaled peak intensity of Cu(I)-hGrx1 vs Apo-hGrx1

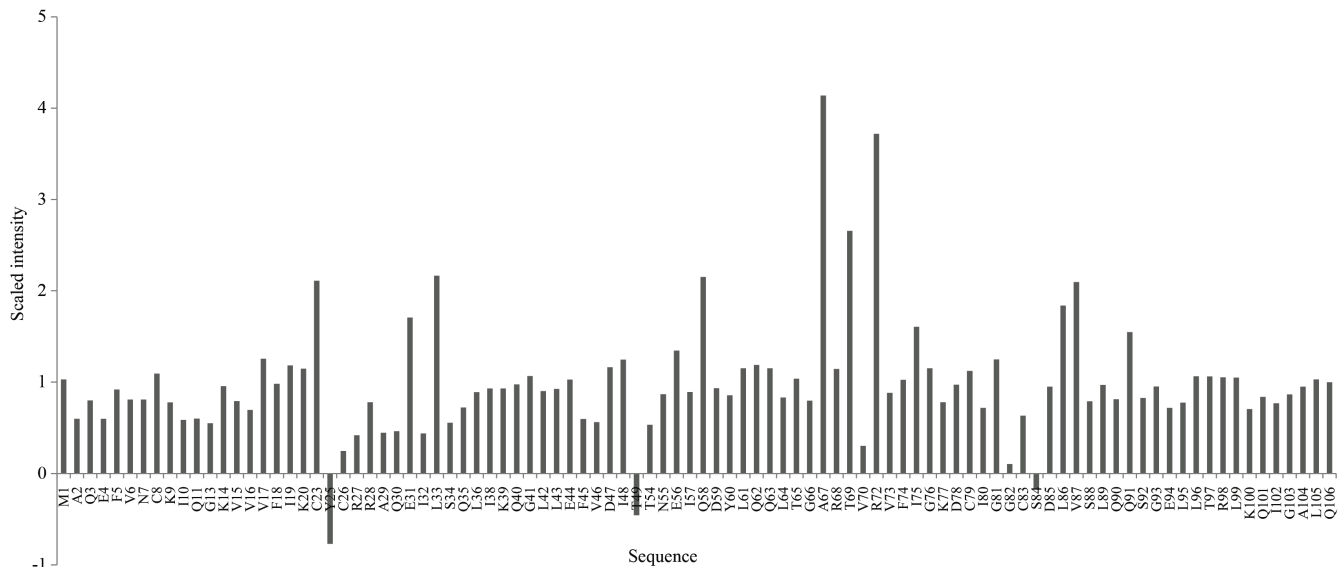

173  
174  
175

Figure S5C

Combined  $\Delta_{H+N}$  chemical shift of  $^{15}\text{N}$ -Cu(I)-hGrx1 titrated with WLN5-6

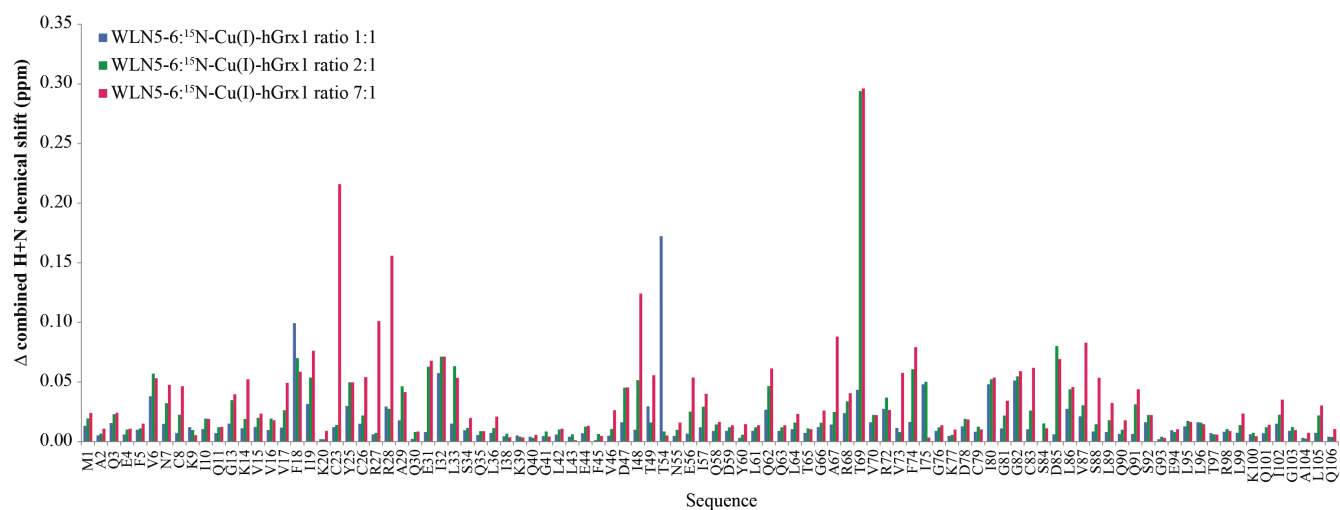

Figure S6A.

176  
177  
178  
179  
180

Scaled peak intensity of  $^{15}\text{N}$ -Cu(I)-hGrx1 titrated with WLN5-6

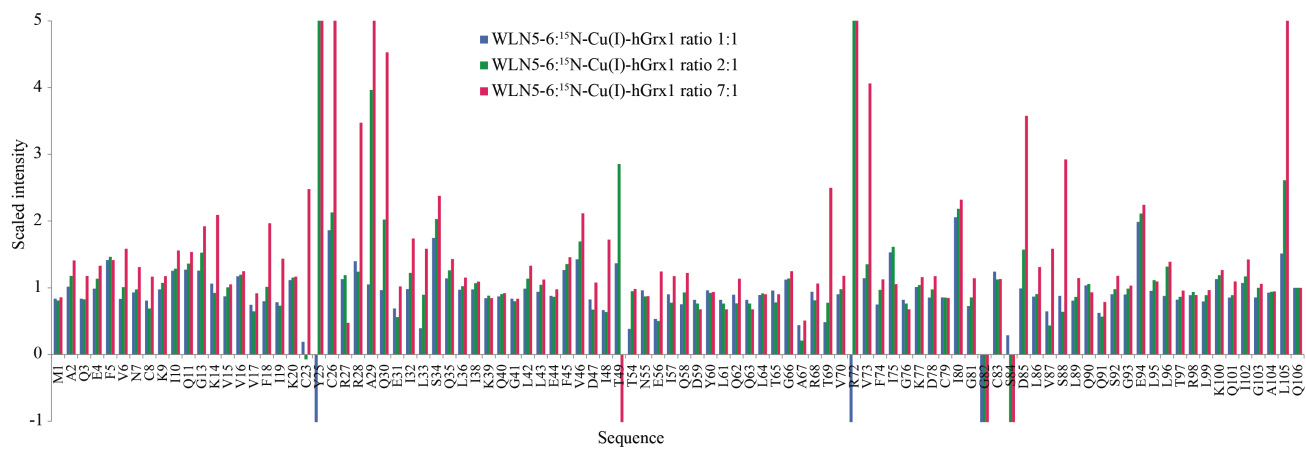

Figure S6B.

181  
182  
183  
184

185

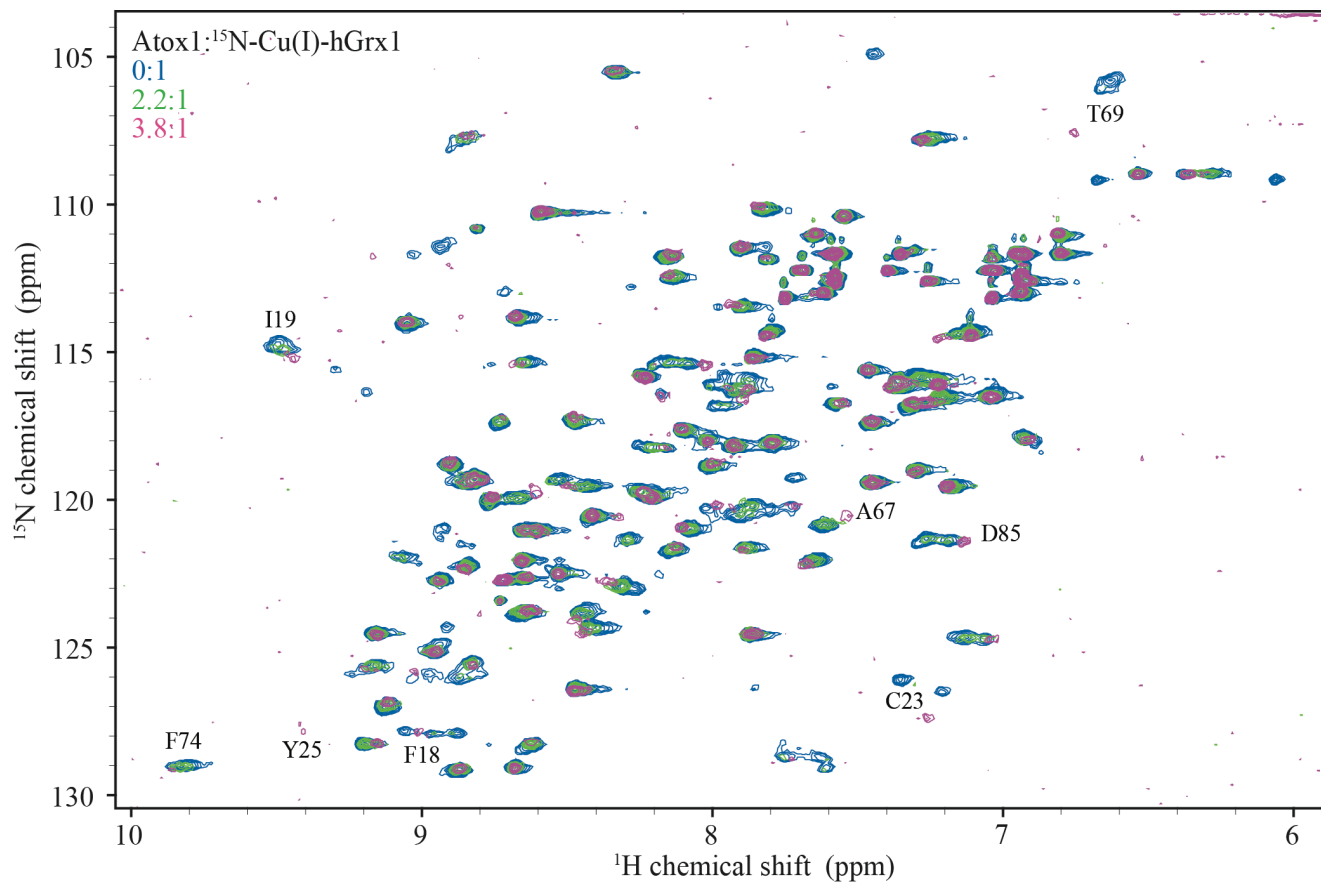

186

187

**Figure S7A.**

188

189  
190

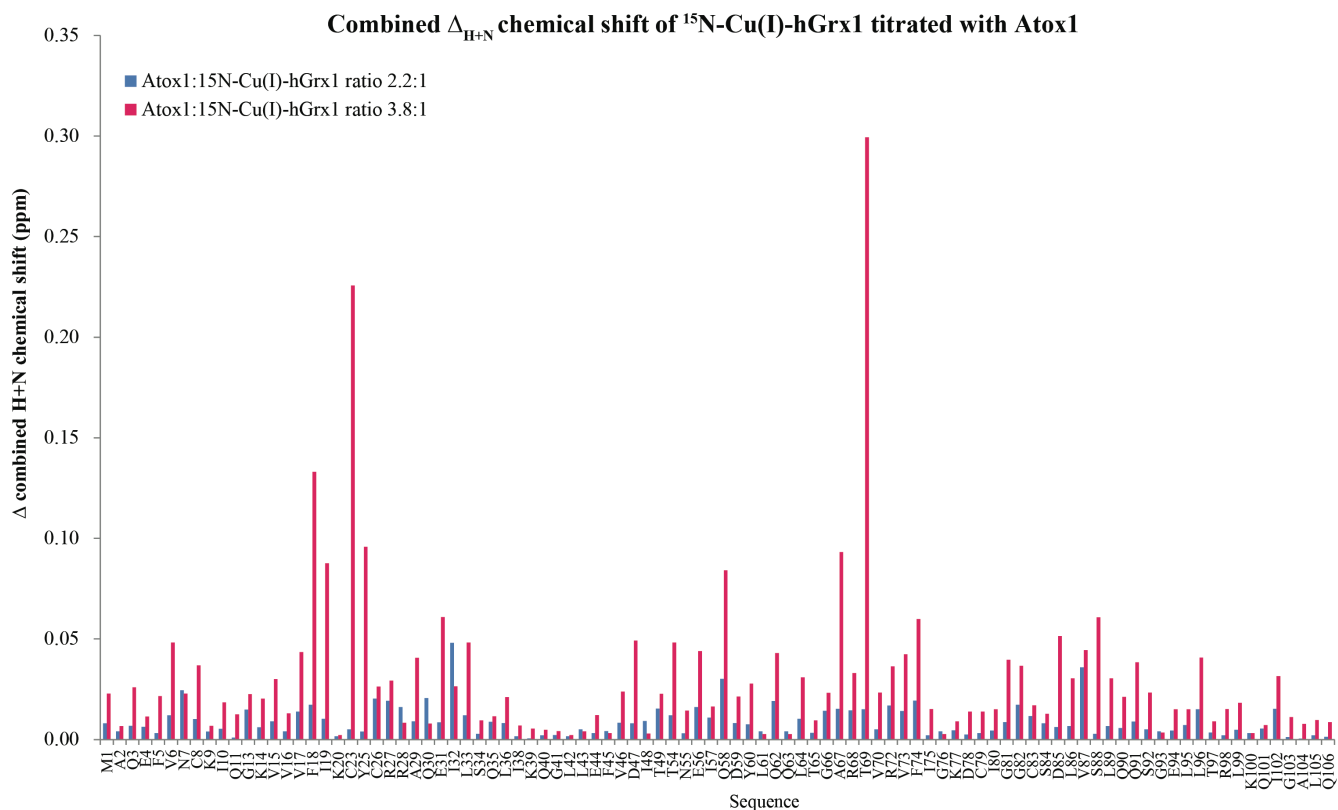

191  
192

**Figure S7B.**

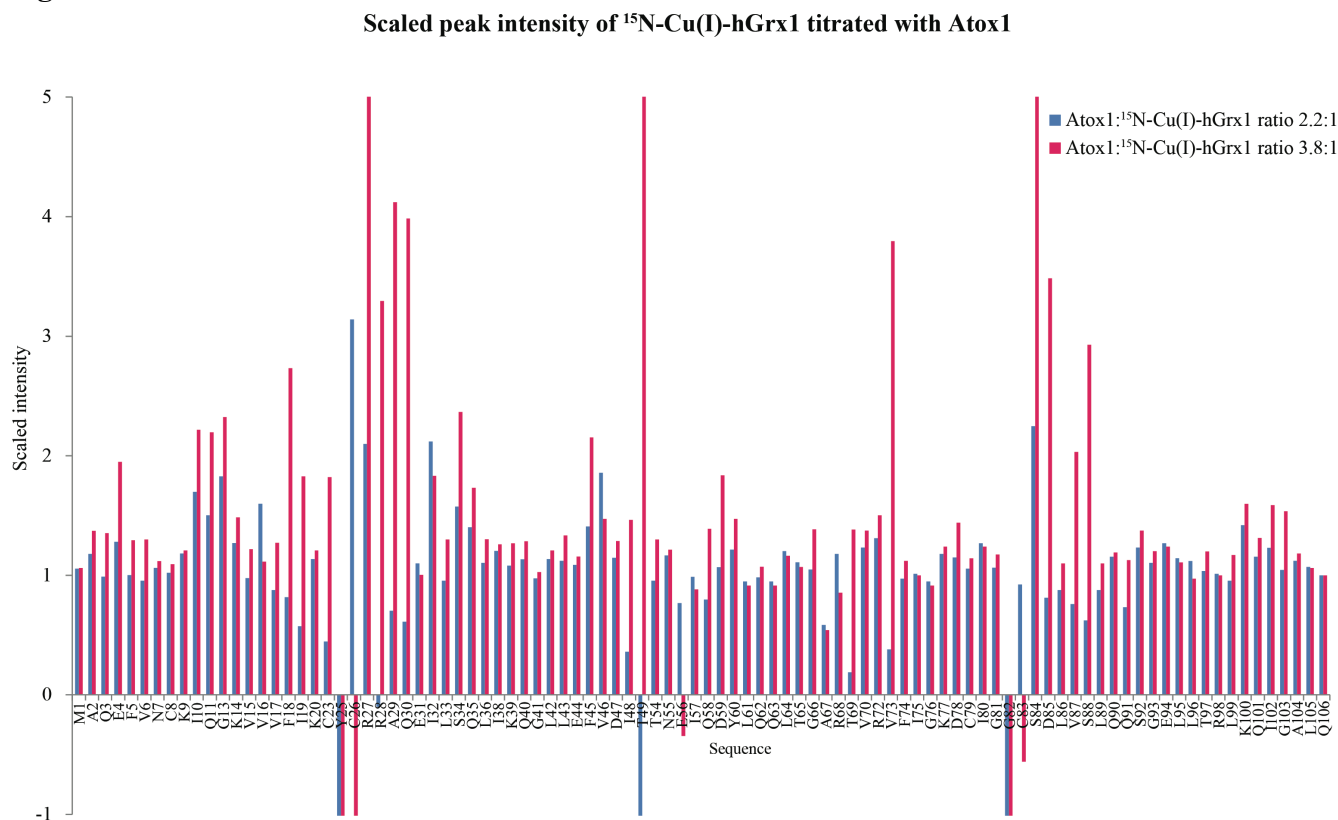

193  
194

**Figure S7C.**

195

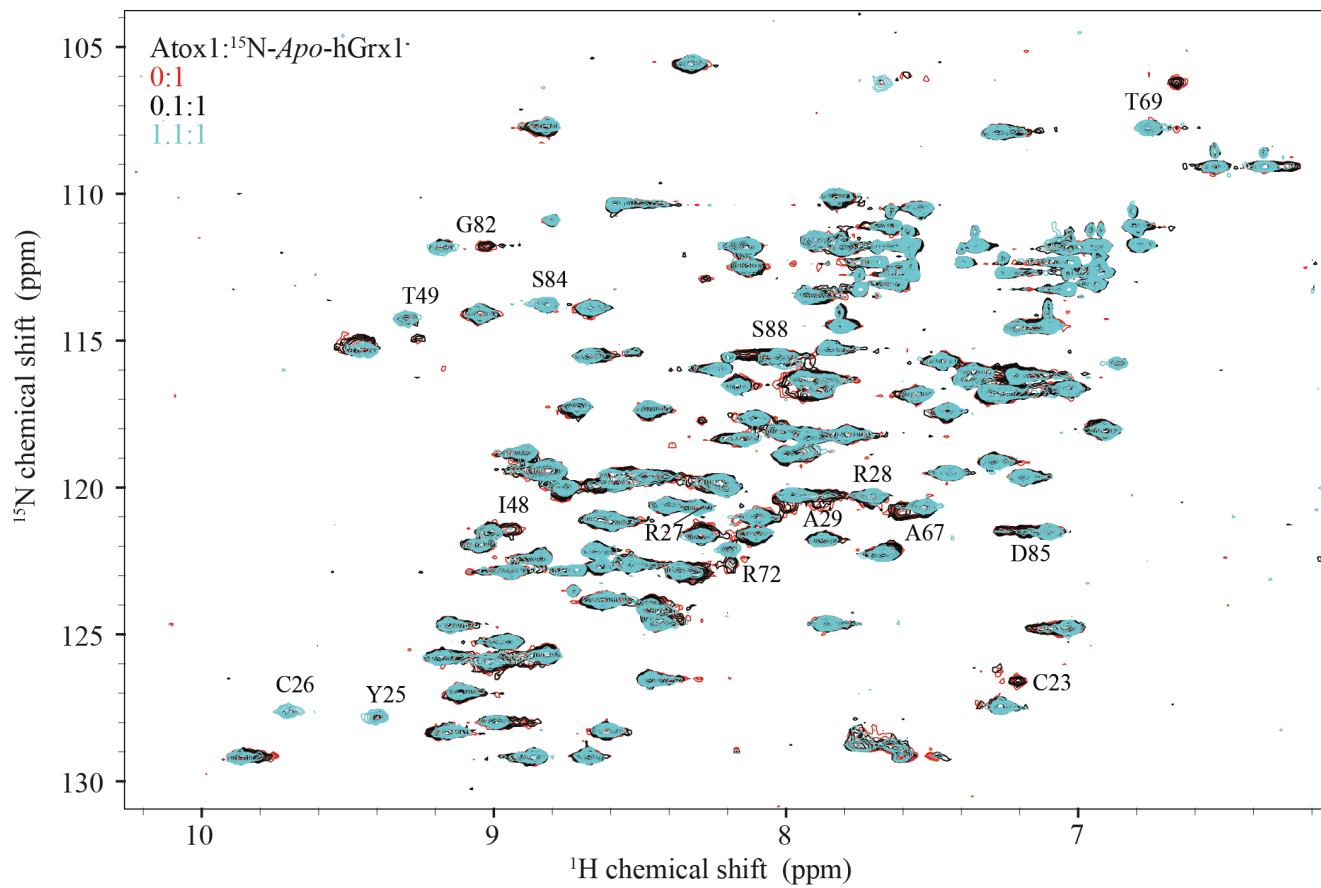

196

197 **Figure S8A.**



Combined  $\Delta_{H+N}$  chemical shift of  $^{15}\text{N}$ -*Apo*-hGrx1 titrated with Atox1

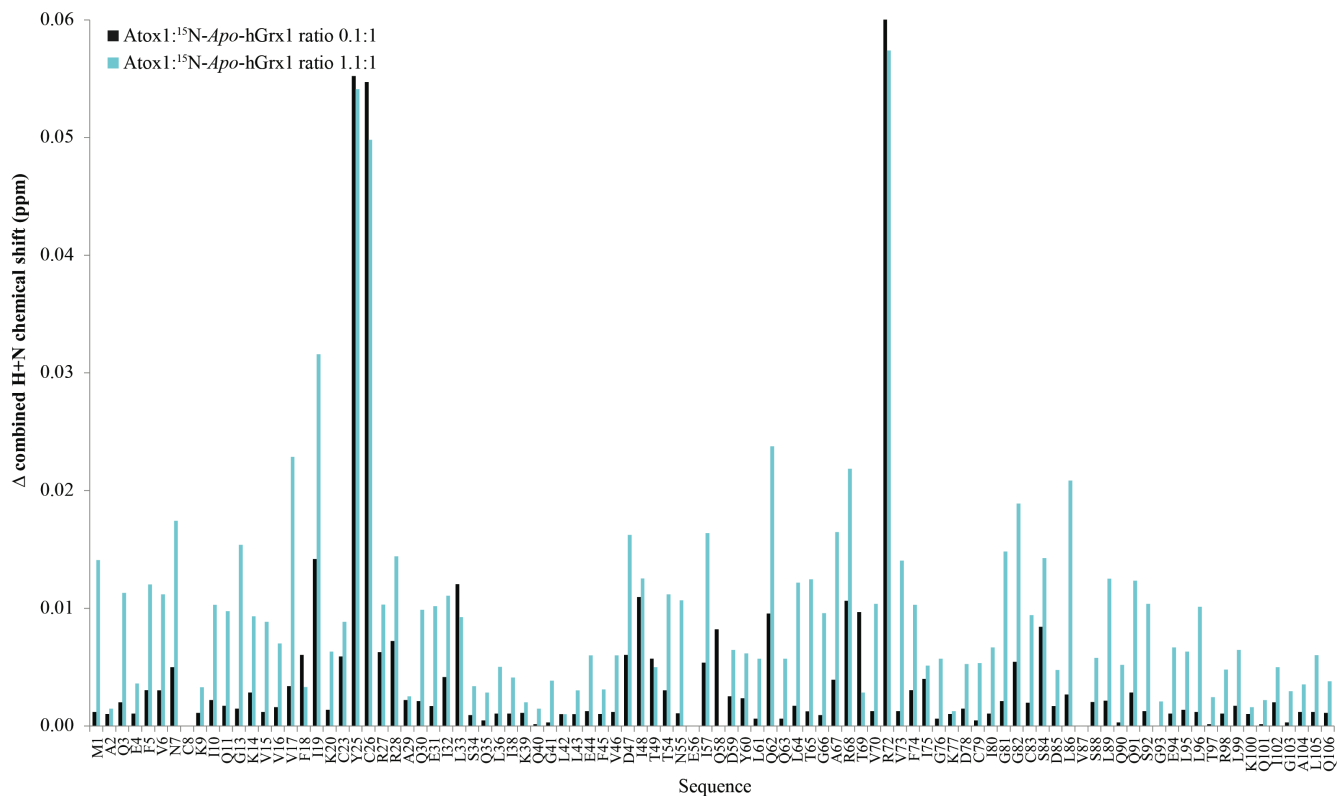

198

199 **Figure S8B.**

Scaled peak intensity of  $^{15}\text{N}$ -*Apo*-hGrx1 titrated with Atox1

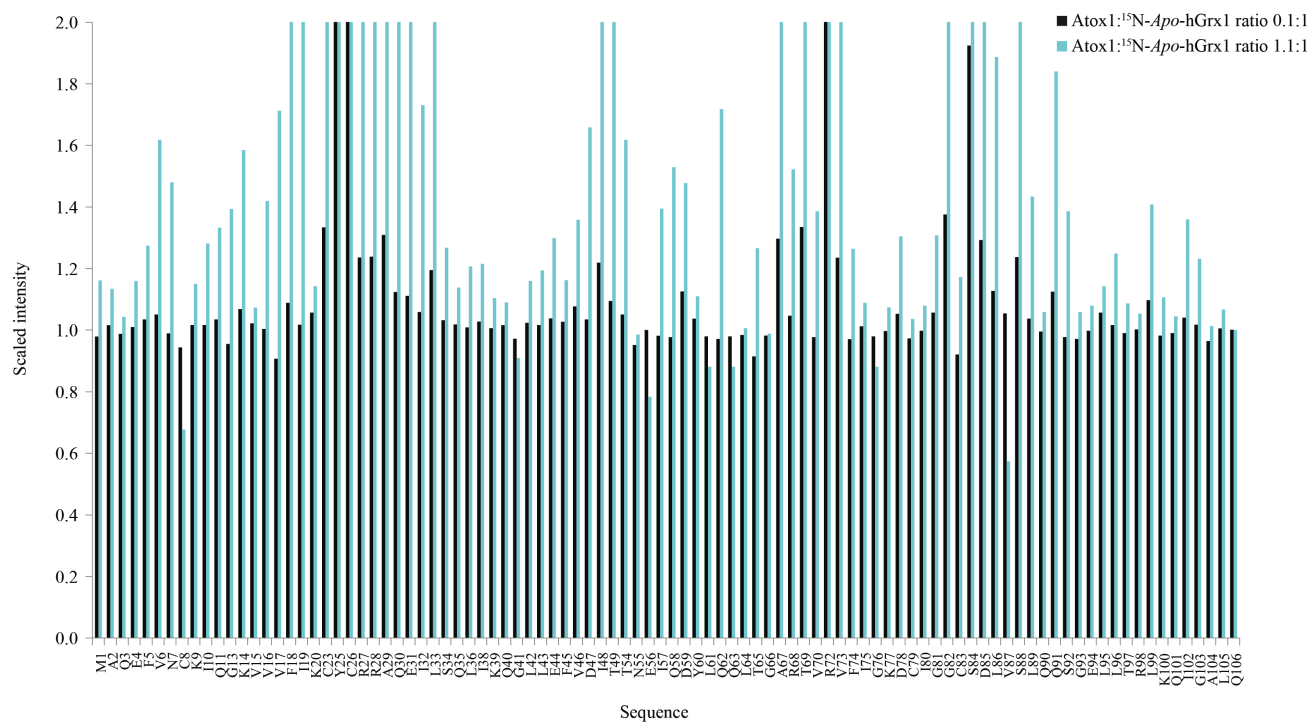

200

201 **Figure S8C.**

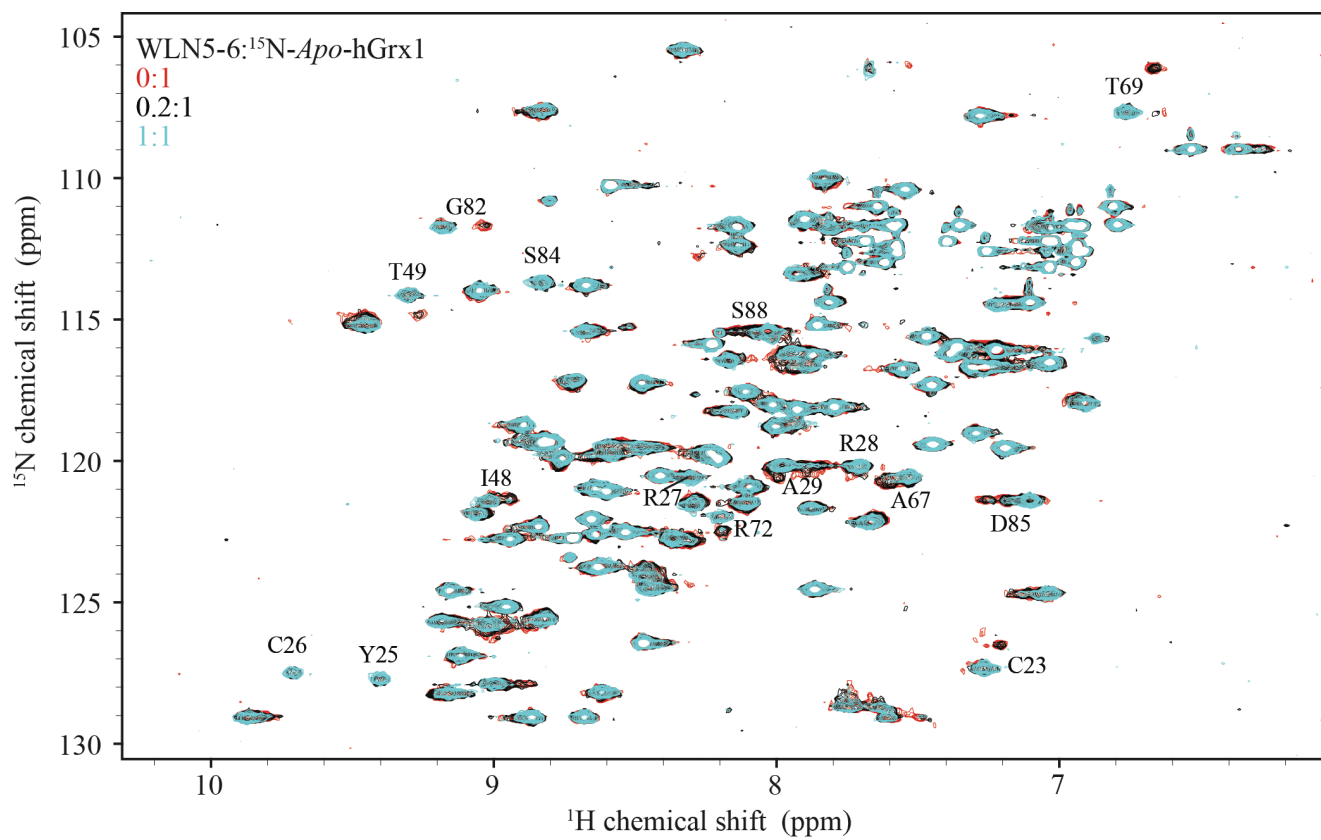

202

203 **Figure S9A.**

204

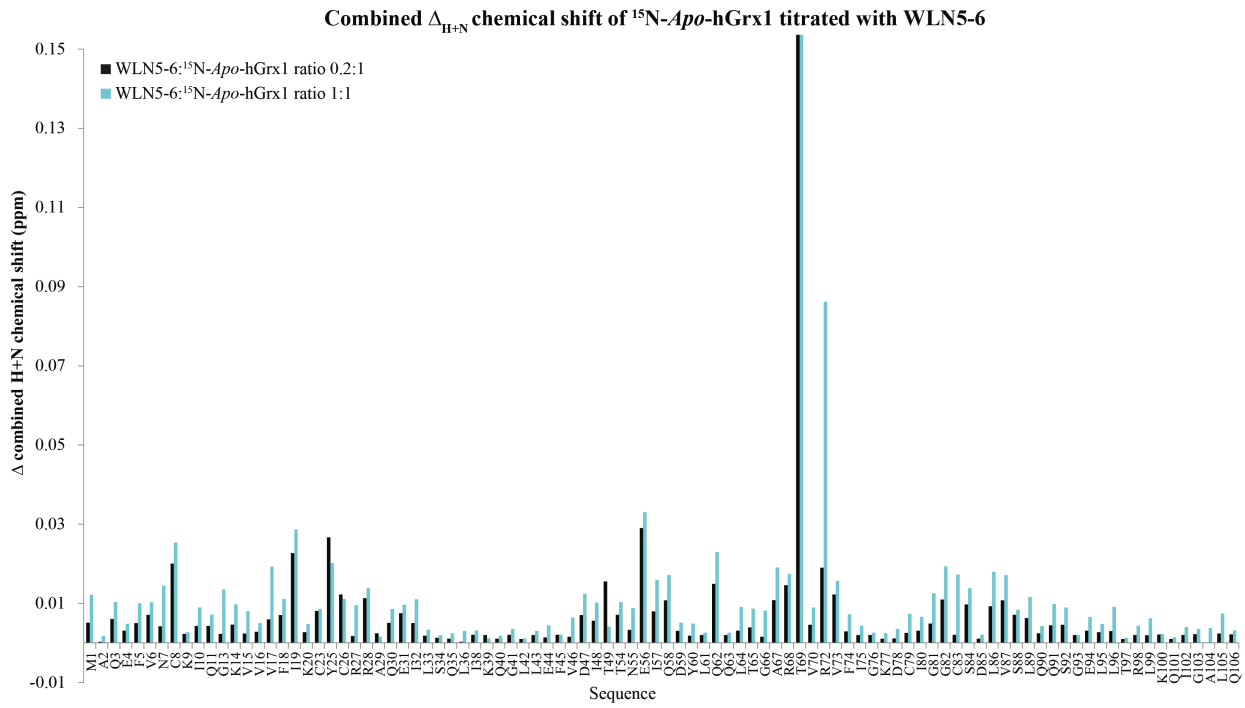

206

207 **Figure S9B.**

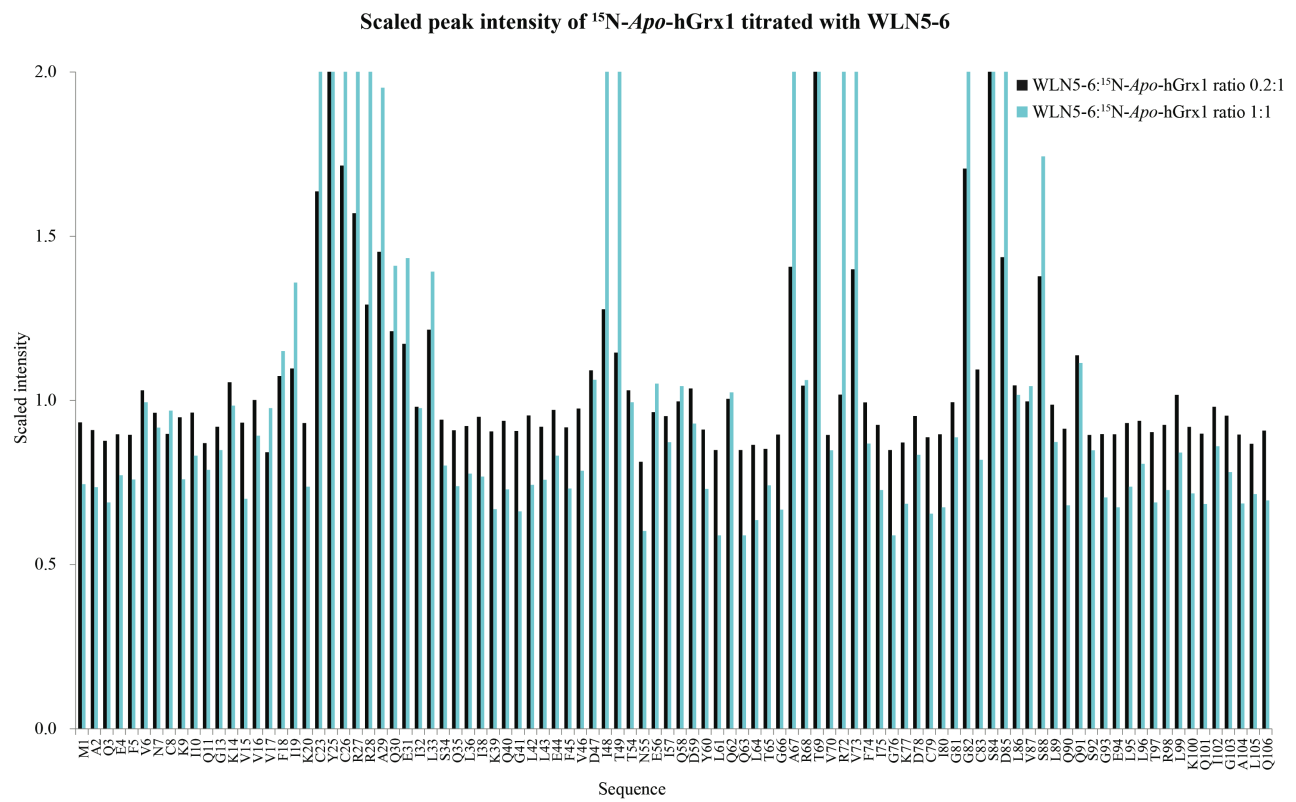

208

209 **Figure S9C.**

210

211

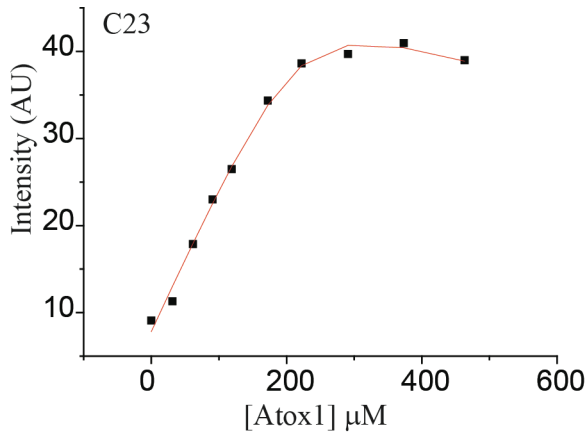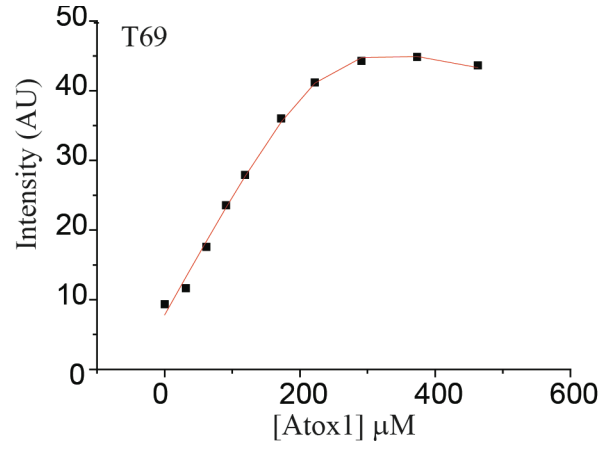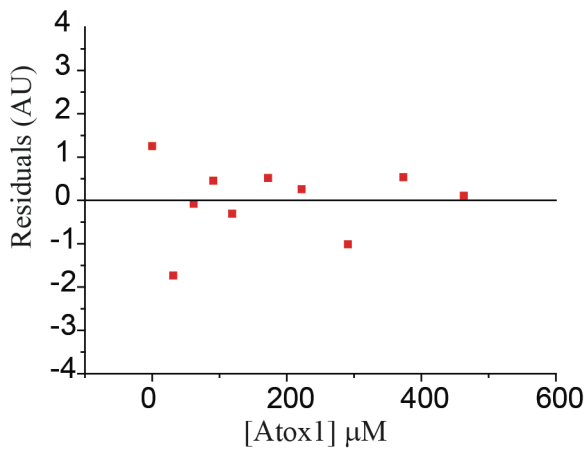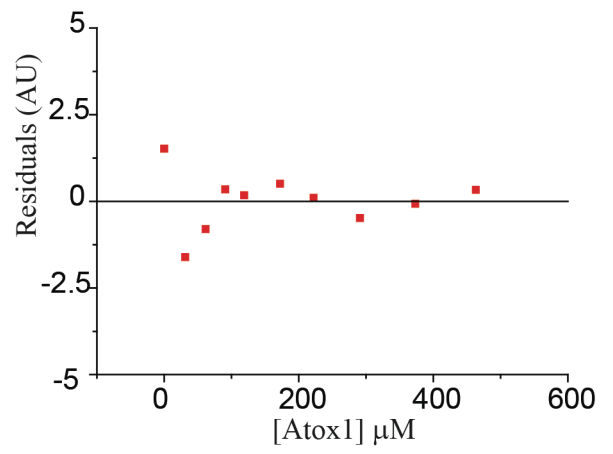

212

213 **Figure S10A.**

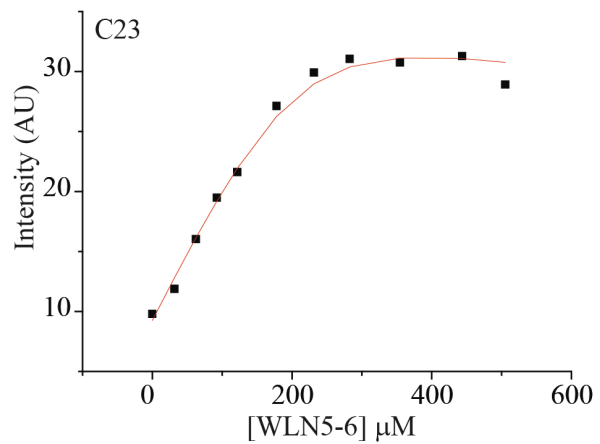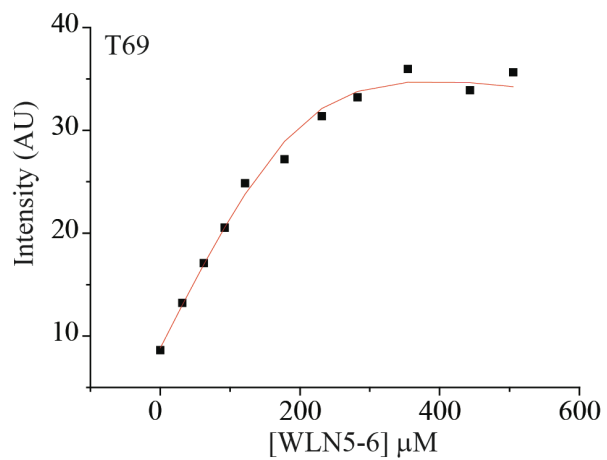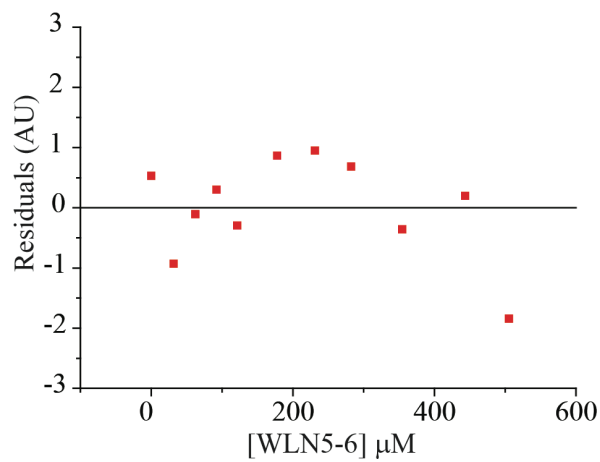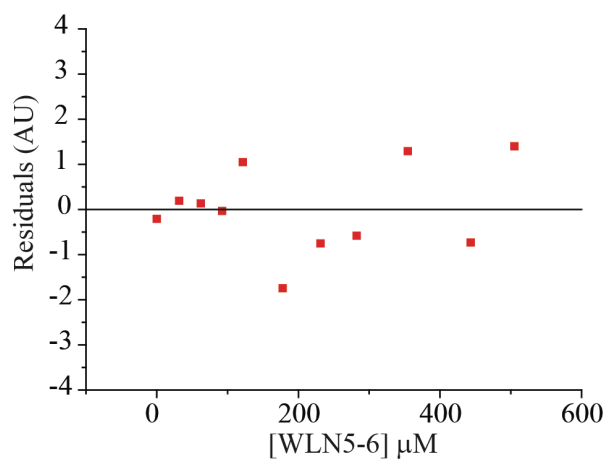

214

215 **Figure S10B.**

216

217

218  
219  
  
222  
223  
224  
225  
226  
227  
228  
229  
  
233  
234  
235  
236  
237  
238

(A)

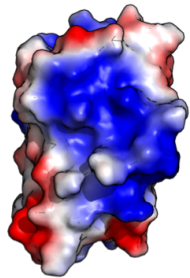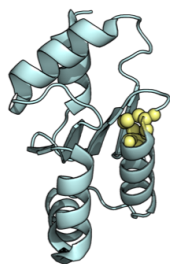

(B)

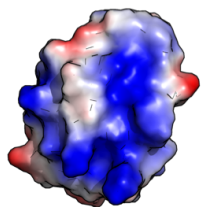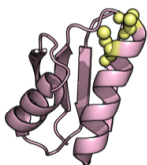

(C)

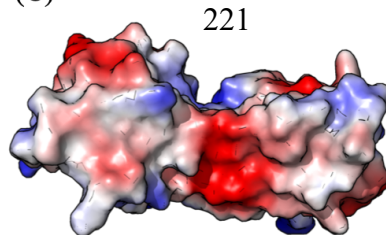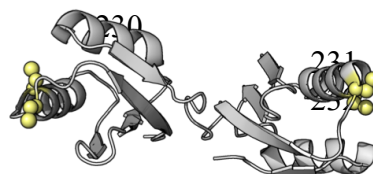

Figure S11.
